# Supplementary material for: Effects of pre-existing orthopoxvirus-specific immunity on the performance of Modified Vaccinia virus Ankara-based influenza vaccines
Source: PubMed Central journal article supplement (PMC5915537; doi:10.1038/s41598-018-24820-2), 2018-04-24
Supplement: 41598_2018_24820_MOESM1_ESM.pdf [file 41598_2018_24820_MOESM1_ESM.pdf]

1 **Effects of pre-existing orthopoxvirus-specific immunity on the**  
2 **performance of Modified Vaccinia virus Ankara-based influenza**  
3 **vaccines**

4

5 *Arwen F Altenburg<sup>1</sup>, Stella E van Trierum<sup>1</sup>, Erwin de Bruin<sup>1</sup>, Dennis de Meulder<sup>1</sup>,*  
6 *Carolien E van de Sandt<sup>1</sup>, Fiona RM van der Klis<sup>2</sup>, Ron AM Fouchier<sup>1</sup>, Marion PG*  
7 *Koopmans<sup>1</sup>, Guus F Rimmelzwaan<sup>1§</sup>, Rory D de Vries<sup>1\*</sup>*

8

9 <sup>1</sup> Department of Viroscience, Postgraduate School of Molecular Medicine, Erasmus MC,  
10 Rotterdam, the Netherlands

11 <sup>2</sup> Centre for Infectious Disease Control (Cib), National Institute of Public Health and the  
12 Environment (RIVM), Bilthoven, the Netherlands

13

14 <sup>§</sup> Current address: Research Center for Emerging Infections and Zoonoses (RIZ),  
15 University of Veterinary Medicine, Hannover, Germany

16

17 \* Corresponding author: Dr. Rory D de Vries, Department of Viroscience, Erasmus MC,  
18 PO Box 2040, 3000 CA Rotterdam, the Netherlands, email address:

19 r.d.devries@erasmusmc.nl

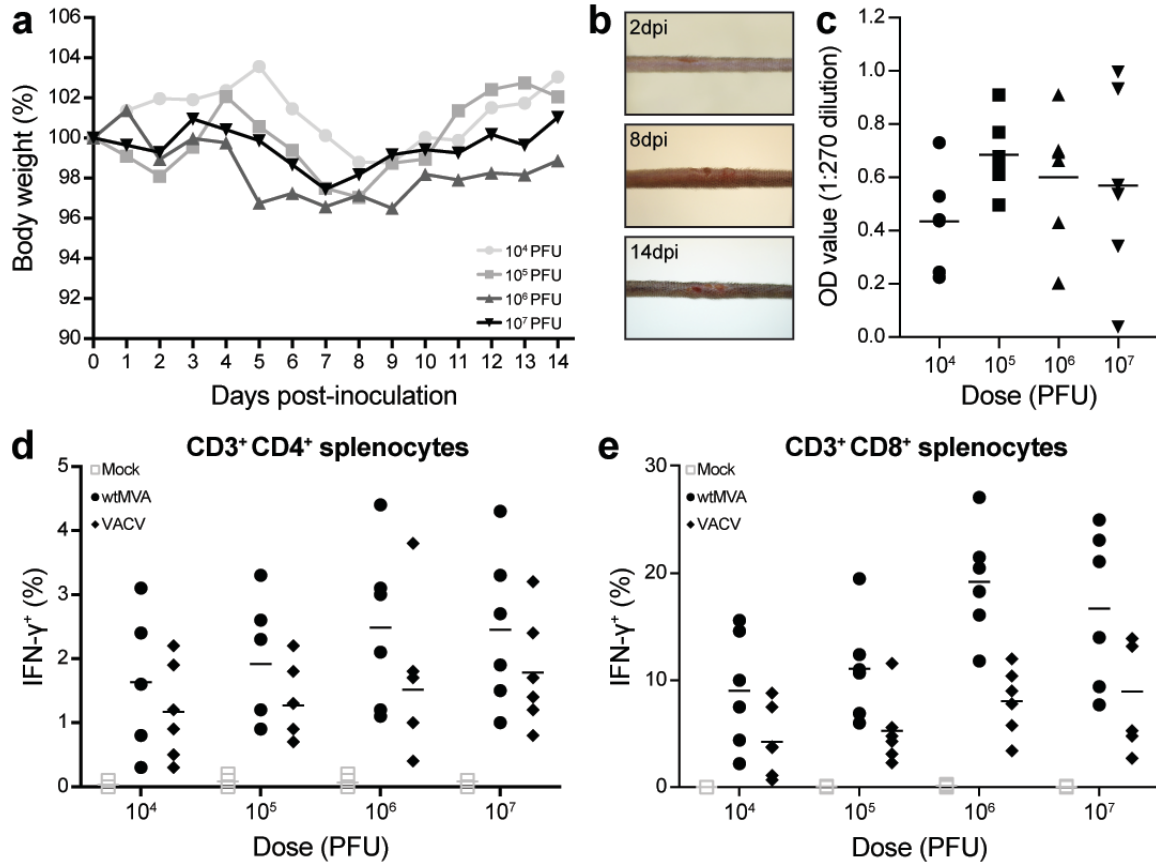

20

21 **Supplemental Figure 1. VACV-Elstree dose-finding.** C57BL/6 mice (n=6 per group) were inoculated with

22 10<sup>4</sup>, 10<sup>5</sup>, 10<sup>6</sup> or 10<sup>7</sup> PFU via tail scarification. **(A)** Mean body weight post-inoculation per group. **(B)**

23 Representative images of blister formation at 2, 8 and 14 days post-inoculation (dpi). **(C)** VACV-Elstree

24 specific antibody responses at 14 dpi were measured by ELISA using VACV-infected HeLa cell lysate. The

25 background signal on mock-infected cell lysate was subtracted. The mean is indicated. **(D-E)** Percentage of

26 interferon (IFN)-γ producing CD3<sup>+</sup>CD4<sup>+</sup> **(D)** and CD3<sup>+</sup>CD8<sup>+</sup> **(E)** splenocytes after stimulation with wild-type

27 (wt)MVA or VACV at 14 dpi. Unstimulated samples were included as negative control and are shown in

28 grey. The mean is indicated.

29

30

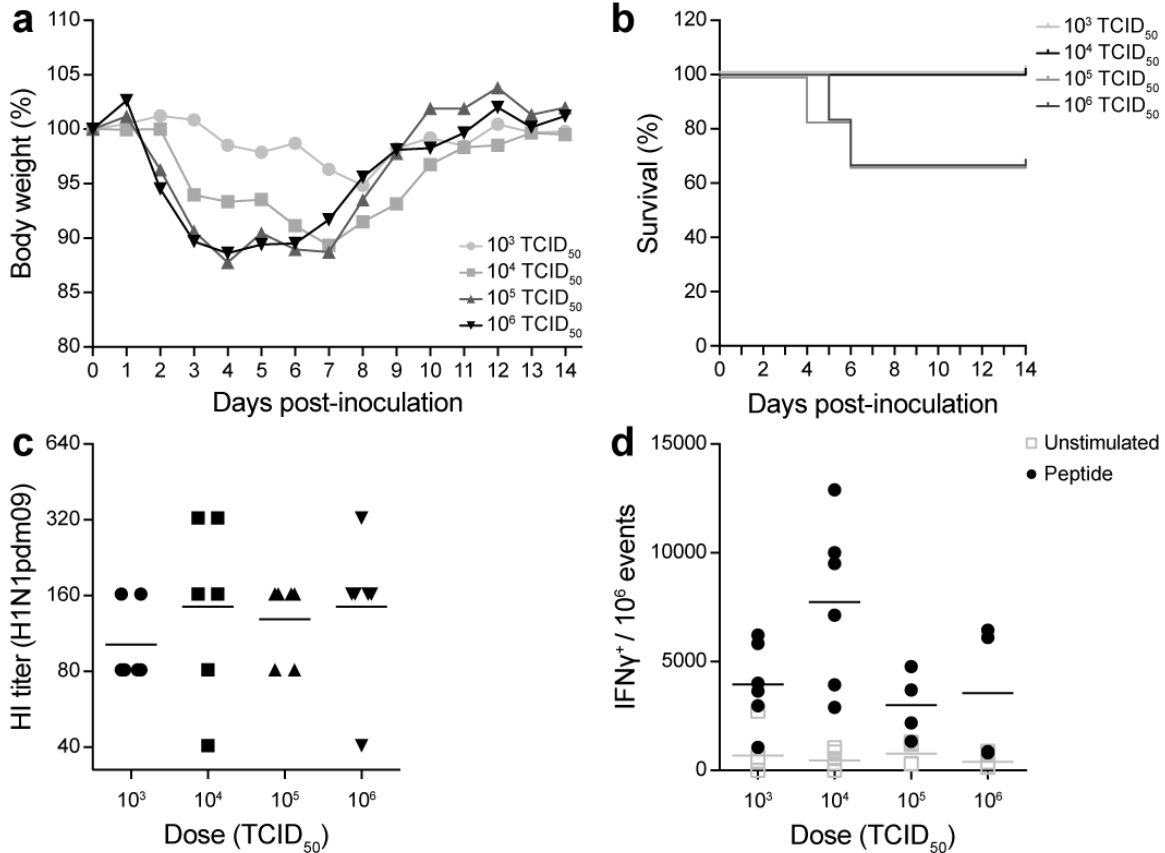

31

32 **Supplemental Figure 2. H1N1pdm09 dose-finding.** C57BL/6 mice (n=6 per group) were inoculated with  
 33 10<sup>3</sup>, 10<sup>4</sup>, 10<sup>5</sup> or 10<sup>6</sup> TCID<sub>50</sub> influenza virus H1N1pdm09. (A) Mean body weight post-inoculation per group.  
 34 (B) Survival curves per group. (C) HI antibody titers against H1N1pdm09 of individual mice at 14 dpi. The  
 35 mean is indicated. (D) Number of IFN- $\gamma$  producing CD3<sup>+</sup>CD8<sup>+</sup> splenocytes of individual mice after stimulation  
 36 with NP<sub>366-374</sub> peptide. Unstimulated samples were included as negative control and are shown in grey. The  
 37 mean is indicated.

38

39

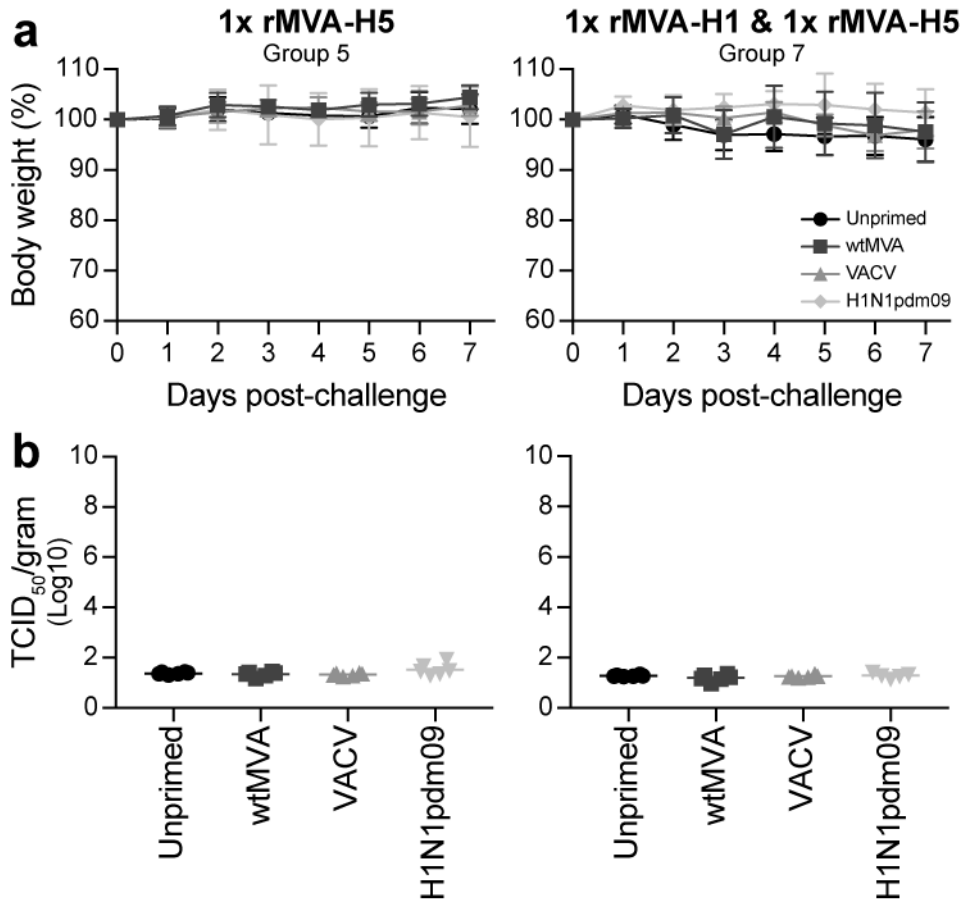

40

41 **Supplemental Figure 3. Pre-existing immunity does not impair protective capacity of a single rMVA-**

42 **H5 vaccination. (A)** Body weight for each of the priming groups after challenge with a lethal dose H5N1

43 influenza virus, shown for group 5 (one rMVA-H5 vaccination) and group 7 (one rMVA-H1 and one rMVA-H5

44 vaccination). Mean and standard deviation (SD) are indicated per priming group. **(B)** Viral load in the lungs

45 shown as TCID<sub>50</sub> per gram lung for each individual animal. Mean is indicated per priming group.

46

47

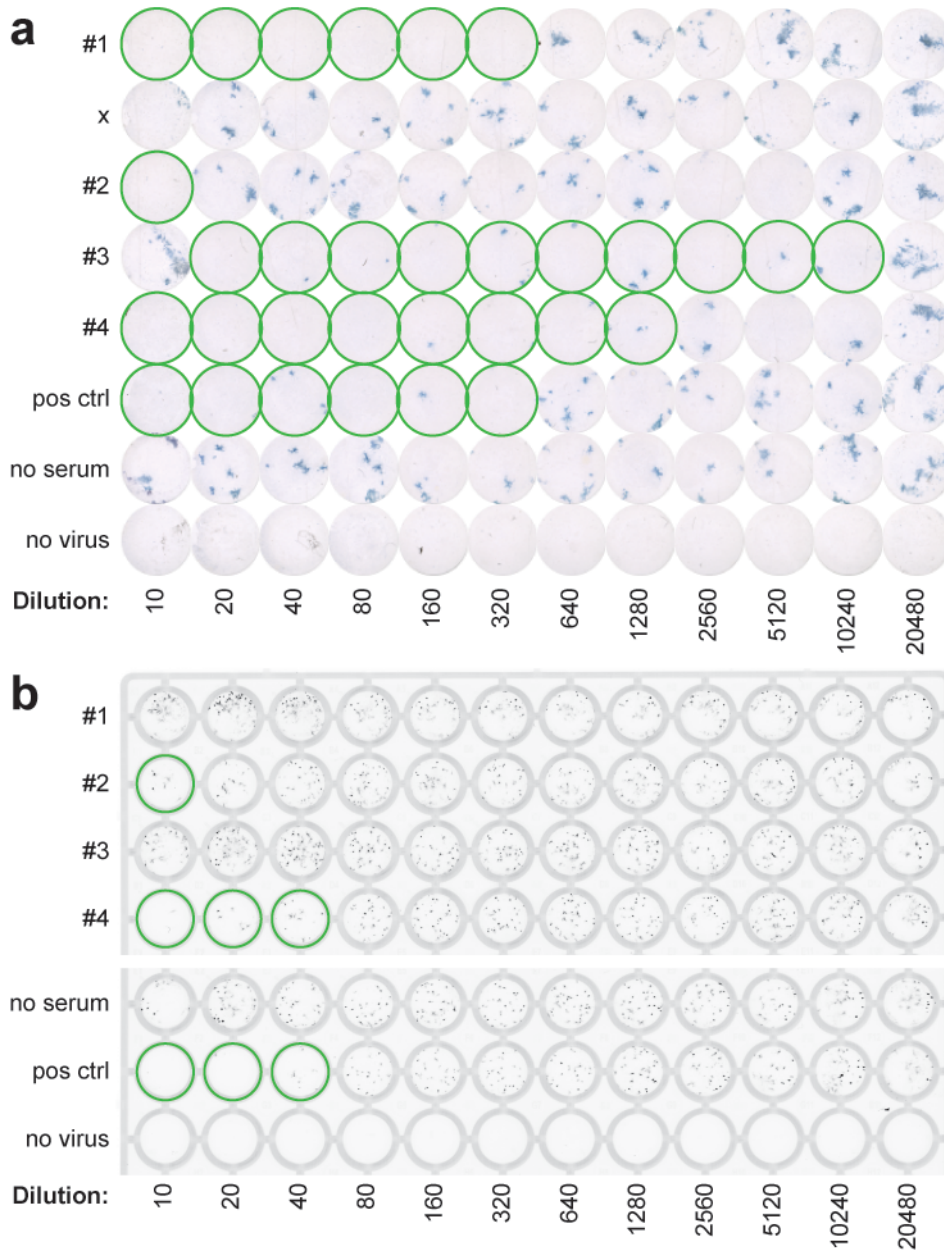

48

49 **Supplemental Figure 4. Quantification of MVA neutralization in plaque reduction assay.** Two-fold  
 50 serial dilutions of mouse sera (A) or human sera (B) were incubated with 200 PFU/well wtMVA or rMVA-  
 51 GFP, respectively. After 2h, the serum-virus mixtures were transferred to CEF cells and incubated for 44-  
 52 48h. (A) For the plaque reduction assay using mouse sera, cells were fixated with acetone and methanol in  
 53 a 1:1 ratio, followed by staining with rabbit anti-VACV and a goat-anti-rabbit HRP conjugate. Substrate was  
 54 revealed using True Blue. Shown is a representative image of an CTL immunospot scan. (B) For the plaque  
 55 reduction assay using human sera, cells were fixated with 2% PFA and directly scanned for GFP  
 56 fluorescence. Shown is a representative image of a Typhoon scan. Neutralization titer was determined as

57 the reciprocal of the highest dilution at which the area covered by plaques was below background (defined  
58 as 50% of the average percentage of the area covered in n=12 wells without any added serum). Wells with  
59 values below the cutoff are indicated with a green outline. #1-4 = number of mouse or human samples, x =  
60 no serum added.  
61
